# Supplementary material for: Retinoic acid-dependent and -independent gene-regulatory pathways of Pitx3 in meso-diencephalic dopaminergic neurons
Source: Oxford University Press journal article supplement (doi:10.1242/dev.071704), 2011-11-08
Supplement: dev071704tables1.pdf [file dev071704tables1.pdf]

**Table S1. List of in vivo Pitx3-regulated genes**

| Transcripts downregulated in E14.5 <i>Pitx3</i> -deficient mdDA neurons ( <i>Pitx3</i> <sup>-/-</sup> versus <i>Pitx3</i> <sup>+/+</sup> ) |                                                                             |         |         |
|--------------------------------------------------------------------------------------------------------------------------------------------|-----------------------------------------------------------------------------|---------|---------|
| Non background corrected                                                                                                                   |                                                                             |         |         |
| Gene symbol                                                                                                                                | BioSeq description                                                          | M-value | P-value |
| <i>Slc18a2</i>                                                                                                                             | Solute carrier family 18 (vesicular monoamine)                              | -0.37   | 0       |
| <i>Snca</i>                                                                                                                                | Synuclein, alpha                                                            | -0.36   | 0       |
| <i>Tcf7l2</i>                                                                                                                              | Transcription factor 7-like 2, T-cell specific, HMG-box                     | -0.32   | 0.01    |
| <i>Nr2f2</i>                                                                                                                               | Nuclear receptor subfamily 2, group F, member 2                             | -0.25   | 0       |
| <i>Tubb2b</i>                                                                                                                              | Tubulin, beta 2B                                                            | -0.23   | 0       |
| <i>Nhlrc2</i>                                                                                                                              | NHL repeat containing 2                                                     | -0.2    | 0       |
| <i>Aldh1a1</i>                                                                                                                             | Aldehyde dehydrogenase family 1, subfamily A1                               | -0.2    | 0       |
| <i>Gramd1a</i>                                                                                                                             | GRAM domain containing 1A                                                   | -0.19   | 0.03    |
| <i>Hddc3</i>                                                                                                                               | HD domain containing 3                                                      | -0.19   | 0       |
| <i>Tubb2c</i>                                                                                                                              | Tubulin, beta 2C                                                            | -0.18   | 0.01    |
| <i>4833420G17Rik</i>                                                                                                                       | RIKEN cDNA 4833420G17 gene                                                  | -0.17   | 0       |
| <i>Pi4k2a</i>                                                                                                                              | Phosphatidylinositol 4-kinase type 2 alpha                                  | -0.15   | 0.01    |
| <i>Lphn2</i>                                                                                                                               | Latrophilin 2                                                               | -0.15   | 0.03    |
| <i>Crmp1</i>                                                                                                                               | Collapsin response mediator protein 1                                       | -0.15   | 0       |
| <i>Tubb2a</i>                                                                                                                              | Tubulin, beta 2A                                                            | -0.15   | 0.01    |
| <i>Socs2</i>                                                                                                                               | Suppressor of cytokine signaling 2                                          | -0.14   | 0.02    |
| <i>AC102575.2</i>                                                                                                                          |                                                                             | -0.14   | 0.04    |
| <i>Gsto1</i>                                                                                                                               | Glutathione S-transferase omega 1                                           | -0.12   | 0       |
| <i>2700078E11Rik</i>                                                                                                                       | RIKEN cDNA 2700078E11 gene                                                  | -0.12   | 0       |
| <i>Usmg5</i>                                                                                                                               | Upregulated during skeletal muscle growth 5                                 | -0.12   | 0.01    |
| <i>AC142115.1</i>                                                                                                                          | Putative uncharacterized protein fragment                                   | -0.12   | 0       |
| <i>Cox15</i>                                                                                                                               | COX15 homolog, cytochrome c oxidase assembly protein (yeast)                | -0.11   | 0.05    |
| <i>Afp</i>                                                                                                                                 | Alpha fetoprotein                                                           | -0.11   | 0.03    |
| <i>Tmem130</i>                                                                                                                             | Transmembrane protein 130                                                   | -0.1    | 0.01    |
| Background corrected                                                                                                                       |                                                                             |         |         |
| Gene symbol                                                                                                                                | BioSeq description                                                          | M-value | P-value |
| <i>Snca</i>                                                                                                                                | Synuclein, alpha                                                            | -2.55   | 0       |
| <i>Aldh1a1</i>                                                                                                                             | Aldehyde dehydrogenase family 1, subfamily A1                               | -1.36   | 0       |
| <i>Slc6a3</i>                                                                                                                              | Solute carrier family 6 (neurotransmitter transporter, dopamine), member 3  | -1.03   | 0       |
| <i>Ttr</i>                                                                                                                                 | Transthyretin                                                               | -0.96   | 0.01    |
| <i>Afp</i>                                                                                                                                 | Alpha fetoprotein                                                           | -0.93   | 0       |
| Transcripts upregulated in E14.5 <i>Pitx3</i> -deficient mdDA neurons ( <i>Pitx3</i> <sup>-/-</sup> versus <i>Pitx3</i> <sup>+/+</sup> )   |                                                                             |         |         |
| Non background corrected                                                                                                                   |                                                                             |         |         |
| Gene symbol                                                                                                                                | BioSeq description                                                          | M-value | P-value |
| <i>En2</i>                                                                                                                                 | Engrailed 2                                                                 | 0.8     | 0       |
| <i>En1</i>                                                                                                                                 | Engrailed 1                                                                 | 0.69    | 0       |
| <i>Cck</i>                                                                                                                                 | Cholecystokinin                                                             | 0.42    | 0       |
| <i>Nts</i>                                                                                                                                 | Neurotensin                                                                 | 0.37    | 0       |
| <i>Spon1</i>                                                                                                                               | Spondin 1, (f-spondin) extracellular matrix protein                         | 0.31    | 0.03    |
| <i>Gbf1</i>                                                                                                                                | Golgi-specific brefeldin A-resistance factor 1                              | 0.3     | 0.05    |
| <i>Cbln1</i>                                                                                                                               | Cerebellin 1 precursor protein                                              | 0.25    | 0       |
| <i>Slc32a1</i>                                                                                                                             | Solute carrier family 32 (GABA vesicular transporter), member 1             | 0.22    | 0       |
| <i>Klf4</i>                                                                                                                                | Kruppel-like factor 4 (gut)                                                 | 0.21    | 0       |
| <i>Bloc1s2</i>                                                                                                                             | Biogenesis of lysosome-related organelles complex-1, subunit 2              | 0.2     | 0       |
| <i>Olig1</i>                                                                                                                               | Oligodendrocyte transcription factor 1                                      | 0.2     | 0       |
| <i>Slc6a4</i>                                                                                                                              | Solute carrier family 6 (neurotransmitter transporter, serotonin), member 4 | 0.19    | 0.05    |
| <i>As3mt</i>                                                                                                                               | Arsenic (+3 oxidation state) methyltransferase                              | 0.18    | 0       |
| <i>Dlk1</i>                                                                                                                                | Delta-like 1 homolog (Drosophila)                                           | 0.15    | 0.01    |
| <i>Tph2</i>                                                                                                                                | Tryptophan hydroxylase 2                                                    | 0.15    | 0.01    |
| <i>Glod5</i>                                                                                                                               | Glyoxalase domain containing 5                                              | 0.14    | 0.01    |
| <i>Ociad1</i>                                                                                                                              | OCIA domain containing 1                                                    | 0.14    | 0.02    |
| <i>Pdgfra</i>                                                                                                                              | Platelet derived growth factor receptor, alpha polypeptide                  | 0.12    | 0.02    |

|                             |                                                                             |         |         |
|-----------------------------|-----------------------------------------------------------------------------|---------|---------|
| <i>Nhedc2</i>               | Na <sup>+</sup> /H <sup>+</sup> exchanger domain containing 2               | 0.12    | 0.01    |
| <i>Wls</i>                  | Wntless homolog (Drosophila)                                                | 0.11    | 0.04    |
| <i>1500015O10Rik</i>        | RIKEN cDNA 1500015O10 gene                                                  | 0.11    | 0.04    |
| <b>Background corrected</b> |                                                                             |         |         |
| Gene symbol                 | BioSeq description                                                          | M-value | P-value |
| <i>Slc6a4</i>               | Solute carrier family 6 (neurotransmitter transporter, serotonin), member 4 | 1.27    | 0       |
| <i>En2</i>                  | Engrailed 2                                                                 | 0.9     | 0       |
| <i>1500015O10Rik</i>        | RIKEN cDNA 1500015O10 gene                                                  | 0.82    | 0       |
| <i>En1</i>                  | Engrailed 1                                                                 | 0.81    | 0.01    |
| <i>2310002L09Rik</i>        | RIKEN cDNA 2310002L09 gene                                                  | 0.75    | 0.02    |

The log differential-expression ratio (M-value) of differentially expressed genes in the mdDA area of E14.5 *Pitx3*<sup>-/-</sup> embryos compared with *Pitx3*<sup>+/+</sup> littermates with and without background correction ( $P < 0.05$ , MAANOVA).
