# Supplementary material for: Retinoic acid-dependent and -independent gene-regulatory pathways of Pitx3 in meso-diencephalic dopaminergic neurons
Source: Oxford University Press journal article supplement (doi:10.1242/dev.071704), 2011-11-08
Supplement: dev071704tables2.pdf [file dev071704tables2.pdf]

**Table S2. List of qPCR primers**

| Primer | Forward (5' to 3')      | Reverse (5' to 3')      |
|--------|-------------------------|-------------------------|
| q18s   | AAACGGCTACCACATCCAAG    | CCTCCAATGGATCCTCGTTA    |
| qCCK   | TAGCGCGATACATCCAGCAGGT  | GGTATTCGTAGTCCTCGGCACT  |
| qTH    | TGCACACAGTACATCCGTCATGC | GCAAATGTGCGGTACGCCAACA  |
| qeGFP  | CGACGGCAACTACAAGAC      | TAGTTGTACTIONCAGCTTGTGC |
| qD2R   | GATGTGCACAGCAAGCATCT    | AGGACAGGACCCAGACAATG    |
| qEn1   | GGTCTACTGCACACGCTATTCTG | AACTCCGCCTTGAGTCTCTGCA  |
| qEn2   | GGTCTACTGCACGCGCTATTCT  | AAACTCAGCCTTGAGCCTCTGG  |
| qDlk1  | TGGCTGTGCAATGGAGTCTGC   | CCACGCAAGTTCATTGTTGGC   |
| qDat   | GGTCTGATTGCCTTCTCCAGT   | GACAACGAAGCCAGAGGAGAAG  |
| qVmat2 | CCTCTTACGACCTTGCTGAAGG  | GCTGCCACTTTCGGGAACACAT  |
| qAhd2  | GGAATACCGTGTTGTCAAGCC   | CCAGGGACAATGTTTACCACGC  |
